# Supplementary material for: Thermoresponsive Liposomes for Photo-Triggered Release of Hypericin Cyclodextrin Inclusion Complex for Efficient Antimicrobial Photodynamic Therapy
Source: PubMed Central journal article supplement — ACS Appl Mater Interfaces. 2022 Jul 5;14(28):31525–40. doi: 10.1021/acsami.2c02741 (PMC9307054; doi:10.1021/acsami.2c02741), 2022-07-05
Supplement: am2c02741_si_001.pdf [file am2c02741_si_001.pdf]

**Thermoresponsive liposomes for photo-triggered release of hypericin cyclodextrin inclusion complex for efficient antimicrobial photodynamic therapy**

Alice Abu Dayyih<sup>a,1</sup>, Bernd Gutberlet<sup>a,1</sup>, Eduard Preis<sup>a</sup>, Konrad H. Engelhardt<sup>a</sup>, Muhammad Umair Amin<sup>a</sup>, Ahmed M. Abdelsalam<sup>a,b</sup>, Martina Bonsu<sup>a</sup> and Udo Bakowsky<sup>a,\*</sup>

<sup>a</sup>Department of Pharmaceutics and Biopharmaceutics, University of Marburg, Robert-Koch-Str. 4, 35037 Marburg, Germany

<sup>b</sup>Department of Pharmaceutics and Industrial Pharmacy, Faculty of Pharmacy, Al-Azhar University, 71524 Assiut, Egypt

<sup>1</sup>These authors contributed equally to this work.

\*Corresponding author: Udo Bakowsky, email address: [ubakowsky@aol.com](mailto:ubakowsky@aol.com)

Tel.: + 49 (0) 6421 28 25884  
Fax: + 49 (0) 6421 28 27016

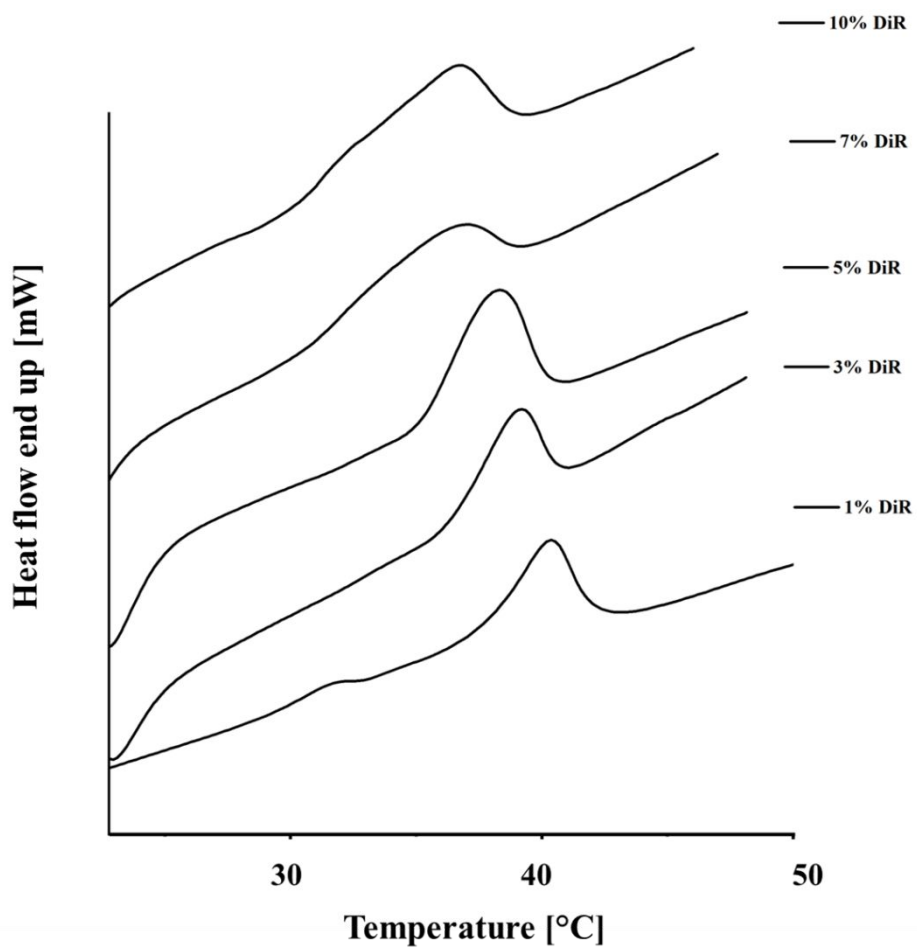

**Figure S1.** DSC thermograms of liposomes (DPPC) obtained with the increasing amount of DiR dye. The thermograms were adjusted for better visualization.

**Table S1.** Characterization of liposomes. Hydrodynamic diameter (Size), polydispersity index (PDI), zeta potential (ZP), before and after NIR irradiation (785 nm, 500 mW, 15 min). Hydrodynamic diameter is expressed as a measure of particle size distribution by intensity. (mean  $\pm$  SD, n = 3)

| <b>Liposomes</b>                        | <b>Size <math>\pm</math> SD [nm], (PDI)</b> | <b>ZP <math>\pm</math> SD [mV]</b> |
|-----------------------------------------|---------------------------------------------|------------------------------------|
| <b>DH<math>\beta</math>CD-TSL</b>       | 133.5 $\pm$ 16.6, (0.20)                    | -15.8 $\pm$ 6.3                    |
| <b>DH<math>\beta</math>CD-TSL (NIR)</b> | 468 $\pm$ 123.3, (0.31)                     | -32.1 $\pm$ 7.0                    |
